# Supplementary material for: Phenotypic and Phylogenetic Characterization of Cu Homeostasis among Xylella fastidiosa Strains
Source: MDPI journal article supplement (doi:10.3390/pathogens10040495), 2021-04-20
Supplement: s1 [file s1]

Supplemental Table S1: Information of *X. fastidiosa* isolates and strains for Cu MIC assessment.

| Stains            | Cu MIC ( $\mu$ M) | Subspecies        | State | Location                   | Host       | Host detail                     | Isolate Sources |
|-------------------|-------------------|-------------------|-------|----------------------------|------------|---------------------------------|-----------------|
| <b>M23</b>        | 450               | <i>fastidiosa</i> | CA    | Kern                       | Almond     | Rosaceae, <i>Prunus dulcis</i>  | 6               |
| <b>Temecula L</b> | 450               | <i>fastidiosa</i> | CA    | Temecula, Riverside        | Grape      | Vitaceae, <i>Vitis vinifera</i> | 1               |
| <b>WM1-1</b>      | 400               | <i>fastidiosa</i> | GA    | Wolf Mountain, Dahlenega   | Grape      | Mourvedre                       | 1               |
| <b>Je28</b>       | 350               | <i>fastidiosa</i> | CA    | Napa, Spring Mountain      | Grape      | Merlot                          | 2               |
| <b>Je17</b>       | 350               | <i>fastidiosa</i> | CA    | Sonoma, Newsome            | Grape      | Malbec                          | 2               |
| <b>14B5</b>       | 350               | <i>fastidiosa</i> | GA    | Blackstock, Dahlenega      | Grape      | Viognier                        | 1               |
| <b>CCPM1</b>      | 350               | <i>fastidiosa</i> | GA    | Cavender Creek, Dahlenega  | Grape      | Petite Manseng                  | 1               |
| <b>16M3</b>       | 350               | <i>fastidiosa</i> | GA    | Montaluce, Dahlenega       | Grape      | Merlot                          | 1               |
| <b>15M1</b>       | 350               | <i>fastidiosa</i> | GA    | Montaluce, Dahlenega       | Grape      | Montaluce                       | 1               |
| <b>Je22</b>       | 300               | <i>fastidiosa</i> | CA    | Napa, Spring Mountain      | Grape      | Merlot                          | 2               |
| <b>Je95</b>       | 300               | <i>fastidiosa</i> | CA    | Sonoma, Rudd               | Grape      | Chardonnay                      | 2               |
| <b>EB92-1</b>     | 300               | <i>fastidiosa</i> | FL    | Leesburg, Lake             | Elderberry | <i>Sambucus canadensis</i>      | 4               |
| <b>R1</b>         | 300               | <i>fastidiosa</i> | GA    | Bacon, Blake Williams Farm | Blueberry  | Rebel                           | 10              |
| <b>R2</b>         | 300               | <i>fastidiosa</i> | GA    | Bacon, Blake Williams Farm | Blueberry  | Rebel                           | 10              |
| <b>14B3</b>       | 300               | <i>fastidiosa</i> | GA    | Blackstock, Dahlenega      | Grape      | Cab Sauvignon                   | 1               |
| <b>15B2</b>       | 300               | <i>fastidiosa</i> | GA    | Blackstock, Dahlenega      | Grape      | Chardonnay                      | 1               |
| <b>16B4</b>       | 300               | <i>fastidiosa</i> | GA    | Blackstock, Dahlenega      | Grape      | Chardonnay                      | 1               |
| <b>14B4</b>       | 300               | <i>fastidiosa</i> | GA    | Blackstock, Dahlenega      | Grape      | Chardonnay                      | 1               |
| <b>14B2</b>       | 300               | <i>fastidiosa</i> | GA    | Blackstock, Dahlenega      | Grape      | Mourvedre                       | 1               |
| <b>15B3</b>       | 300               | <i>fastidiosa</i> | GA    | Blackstock, Dahlenega      | Grape      | Viognier                        | 1               |

|                            |     |                   |    |                               |                  |                                    |    |
|----------------------------|-----|-------------------|----|-------------------------------|------------------|------------------------------------|----|
| <b>16M7</b>                | 300 | <i>fastidiosa</i> | GA | Montaluce,<br>Dahlonge        | Grape            | Vidal                              | 1  |
| <b>Je63</b>                | 250 | <i>fastidiosa</i> | CA | Bakersfield,<br>Flames        | Grape            | Flames                             | 2  |
| <b>Je68</b>                | 250 | <i>fastidiosa</i> | CA | Bakersfield,<br>Flames        | Grape            | Flames                             | 2  |
| <b>Je73</b>                | 250 | <i>fastidiosa</i> | CA | Bakersfield,<br>Red Globe     | Grape            | Red Globe                          | 2  |
| <b>Je60</b>                | 250 | <i>fastidiosa</i> | CA | Bakersfield,<br>Scarlet Royal | Grape            | Scarlet Royal                      | 2  |
| <b>Je51</b>                | 250 | <i>fastidiosa</i> | CA | Napa,<br>Silverado            | Grape            | Merlot                             | 2  |
| <b>Je43</b>                | 250 | <i>fastidiosa</i> | CA | Napa, Yount<br>Mill           | Grape            | Cabernet<br>Sauvignon              | 2  |
| <b>Je1</b>                 | 250 | <i>fastidiosa</i> | CA | Santa Barbara                 | Grape            | Chardonnay                         | 2  |
| <b>Je4</b>                 | 250 | <i>fastidiosa</i> | CA | Santa Barbara                 | Grape            | Pinot Noir                         | 2  |
| <b>Je92</b>                | 250 | <i>fastidiosa</i> | CA | Sonoma,<br>MacMurray          | Grape            | Gruner<br>Veltliner                | 2  |
| <b>Je98</b>                | 250 | <i>fastidiosa</i> | CA | Temecula                      | Grape            | N/A                                | 2  |
| <b>Je100</b>               | 250 | <i>fastidiosa</i> | CA | Temecula                      | Grape            | N/A                                | 2  |
| <b>16B5</b>                | 250 | <i>fastidiosa</i> | GA | Blackstock,<br>Dahlonge       | Grape            | Chardonnay                         | 1  |
| <b>15B1</b>                | 250 | <i>fastidiosa</i> | GA | Blackstock,<br>Dahlonge       | Grape            | Merlot                             | 1  |
| <b>16B1</b>                | 250 | <i>fastidiosa</i> | GA | Blackstock,<br>Dahlonge       | Grape            | Merlot                             | 1  |
| <b>16M5</b>                | 250 | <i>fastidiosa</i> | GA | Montaluce,<br>Dahlonge        | Grape            | Pinot Noir                         | 1  |
| <b>M1</b>                  | 250 | <i>fastidiosa</i> | GA | Pierce, Stevie<br>Yong Farm   | Blueberry        | Meadowlark                         | 10 |
| <b>VAL VAL<br/>072 Ext</b> | 350 | <i>multiplex</i>  | TX | Del Rio, Val<br>Verde         | Giant<br>Ragweed | Ambrosia<br>trifida var.<br>texana | 3  |
| <b>BB08-1</b>              | 300 | <i>multiplex</i>  | FL | Palatka,<br>Putnam            | Blueberry        | Star                               | 4  |
| <b>AlmaEM3</b>             | 300 | <i>multiplex</i>  | GA | Alma                          | Blueberry        | Emerald                            | 1  |
| <b>S1</b>                  | 300 | <i>multiplex</i>  | GA | Bacon, Blake<br>Williams Farm | Blueberry        | Star                               | 10 |
| <b>S3</b>                  | 300 | <i>multiplex</i>  | GA | Bacon, Blake<br>Williams Farm | Blueberry        | Star                               | 10 |
| <b>BB1-64</b>              | 300 | <i>multiplex</i>  | GA | N/A                           | Blueberry        | N/A                                | 5  |

|                        |     |                  |       |                            |                  |                               |    |
|------------------------|-----|------------------|-------|----------------------------|------------------|-------------------------------|----|
| <b>Georgia Plum</b>    | 300 | <i>multiplex</i> | GA    | N/A                        | Plum             | Rosaceae, Prunus sp.          | 2  |
| <b>GIL GRA 274 Ext</b> | 300 | <i>multiplex</i> | TX    | Willow City, Gillespie     | Annual Sunflower | Asteraceae, Helianthus annuus | 3  |
| <b>R3</b>              | 250 | <i>multiplex</i> | GA    | Bacon, Blake Williams Farm | Blueberry        | Rebel                         | 10 |
| <b>S2</b>              | 250 | <i>multiplex</i> | GA    | Bacon, Blake Williams Farm | Blueberry        | Star                          | 10 |
| <b>M12</b>             | 200 | <i>multiplex</i> | CA    | Kern                       | Almond           | Rosaceae, Prunus dulcis       | 6  |
| <b>ESVL</b>            | 200 | <i>multiplex</i> | Spain | Alicante                   | Almond           | N/A                           | 8  |
| <b>IVIA5901</b>        | 200 | <i>multiplex</i> | Spain | Alicante                   | Almond           | N/A                           | 8  |
| <b>Oak 92-6</b>        | 100 | <i>multiplex</i> | FL    | Palm Beach                 | Oak              | Quercus sp.                   | 4  |
| <b>De Donno</b>        | 350 | <i>pauca</i>     | Italy | Apulia                     | Olive            | Olea europaea L.              | 9  |
| <b>Ann-1</b>           | 800 | <i>sandyi</i>    | CA    | N/A                        | Oleander         | N/A                           | 2  |
| <b>MED PRI 047</b>     | 400 | <i>sandyi</i>    | TX    | Median                     | Oleander         | N/A                           | 3  |

N/A = information non-available

Isolate Sources: 1: Leonardo De La Fuente (Auburn University), 2: Rodrigo Almeida (University of California, Berkeley), 3: Mark Black (Texas A&M University), 4: Donald Hopkins (University of Florida), 5: Harald Scherm (University of Georgia), 6: Jianchi Chen (USDA, Parlier, CA), 7: C.J. Chang (University of Georgia), 8: Blanca Landa (CSIC-IAS, Spain), 9. Maria Saponari (CNR, Italy), 10: Jonathan E. Oliver (University of Georgia, Tifton)
