# Supplementary material for: Phenotypic and Phylogenetic Characterization of Cu Homeostasis among Xylella fastidiosa Strains
Source: MDPI journal article supplement (doi:10.3390/pathogens10040495), 2021-04-20
Supplement: s1 [file s1]

Figure S2: Phylogenetic trees of *copA*, *copB*, *copL* and *cutC* genes in the strains with Cu MIC that were tested.

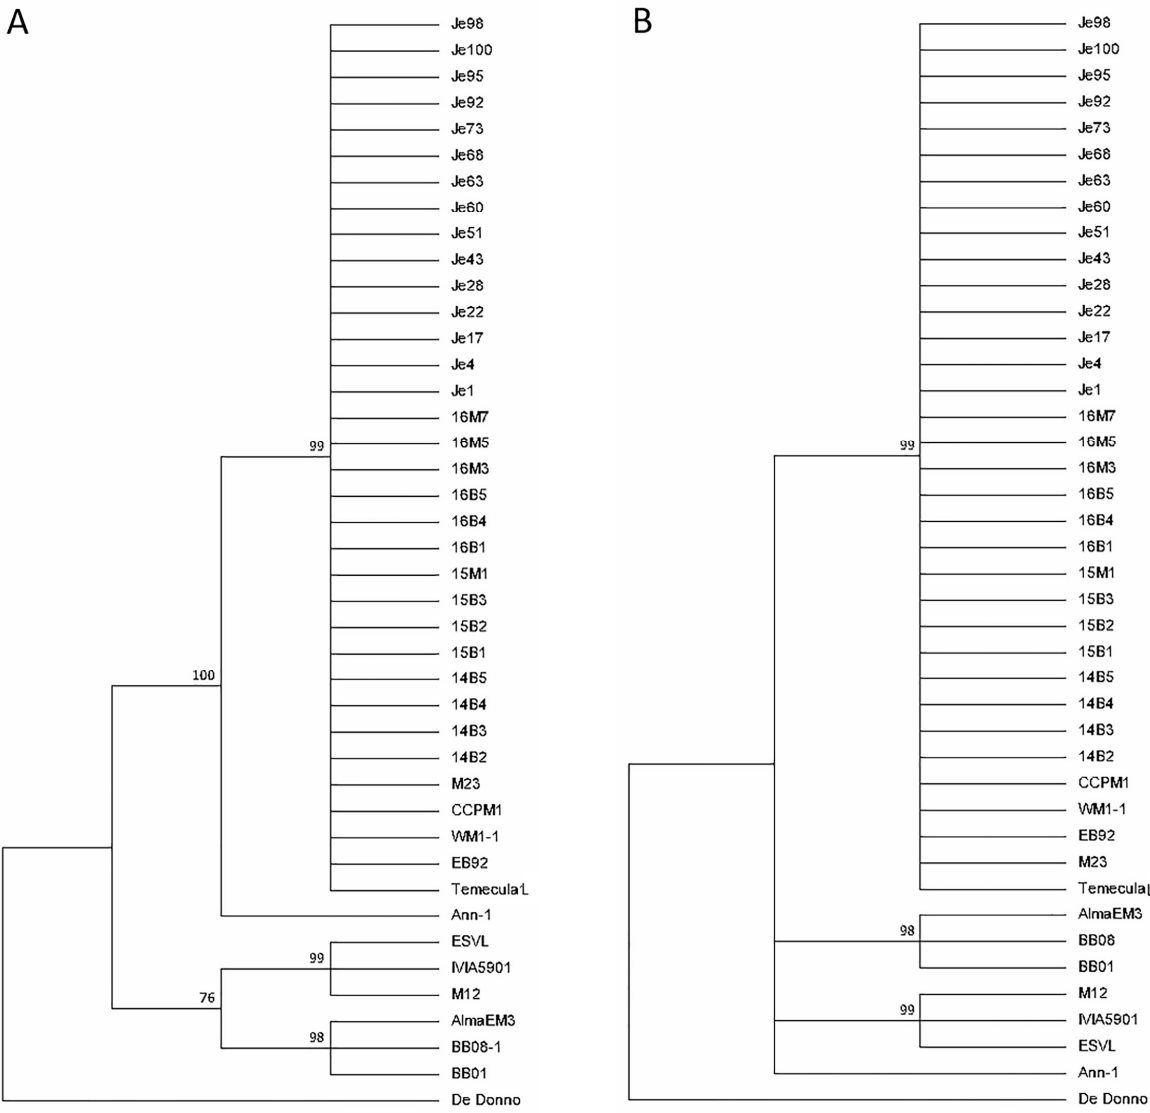

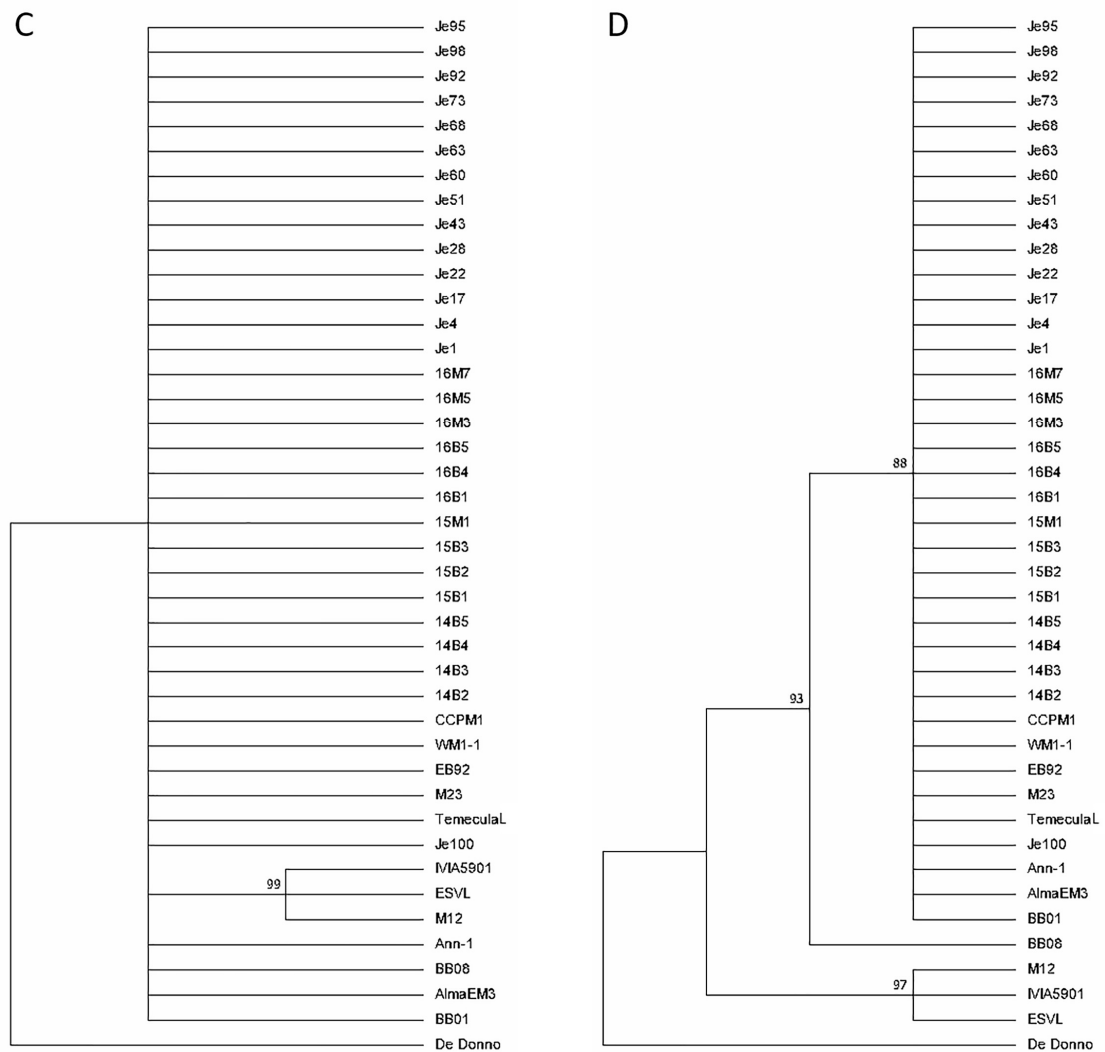

Phylogenetic trees of *copA*, *copB*, *copL* and *cutC* genes in the strains with Cu MIC been assessed. Phylogenetic trees of (A) *copA*; (B) *copB*; (C) *copL* and (D) *cutC* genes in the strains that has been analyzed in Cu MIC experiment. Maximum-likelihood phylogenetic trees were built using MEGA 7.0, Branches below 70% of bootstraps value were collapsed
