# Supplementary material for: Phenotypic and Phylogenetic Characterization of Cu Homeostasis among Xylella fastidiosa Strains
Source: MDPI journal article supplement (doi:10.3390/pathogens10040495), 2021-04-20
Supplement: s1 [file s1]

Supplemental Table S2: Information of *X. fastidiosa* isolates and strains for phylogeny.

| Strain                                             | Host plant                                  | Place of isolation | Reference                  | GenBank Accession |
|----------------------------------------------------|---------------------------------------------|--------------------|----------------------------|-------------------|
| <i>Xylella fastidiosa</i> subsp. <i>fastidiosa</i> |                                             |                    |                            |                   |
| <b>ATCC 35879</b>                                  | Grape                                       | USA (FL)           | [1]                        | JQAP000000.1      |
| <b>CCPM1</b>                                       | Grape                                       | USA (GA)           | [2]                        | PUJB000000.1      |
| <b>CFBP7969</b>                                    | Grape                                       | USA(NC)            | [3]                        | PHFQ000000.1      |
| <b>CFBP7970</b>                                    | Grape                                       | USA (FL)           | [3]                        | PHFR000000.1      |
| <b>CFBP8071</b>                                    | Almond                                      | USA (CA)           | [3]                        | PHFP000000.1      |
| <b>CFBP8073</b>                                    | Coffee                                      | France             | [4]                        | LKES000000.1      |
| <b>CFBP8082</b>                                    | Annual ragweed                              | USA (FL)           | [3]                        | PHFT000000.1      |
| <b>CFBP8351</b>                                    | Grape                                       | USA (CA)           | [3]                        | PHFU000000.1      |
| <b>DSM 10026</b>                                   | Grape                                       | USA (FL)           | (Varghese JN, unpublished) | FQWN000000.1      |
| <b>EB92-1</b>                                      | Elderberry                                  | USA (FL)           | [5]                        | AFDJ000000.1      |
| <b>GB514</b>                                       | Grape                                       | USA (TX)           | [6]                        | CP002165.1        |
| <b>gfpWM1-1 Rec1</b>                               | Recombinants of WM1-1 with KLN59.3 donor    | In vitro           | [7]                        | PUJD000000.1      |
| <b>gfpWM1-1 Rec2</b>                               | Recombinants of WM1-1 with KLN59.3 donor    | In vitro           | [7]                        | PUJE000000.1      |
| <b>IVIA5235</b>                                    | Cherry                                      | Spain              | [8]                        | CP047171.1        |
| <b>M23</b>                                         | Almond                                      | USA (CA)           | [9]                        | CP001011.1        |
| <b>NS1-CmR</b>                                     | Mutant of TemeculaL                         | In vitro           | [10]                       | PUJF000000.1      |
| <b>NS1pglA Rec</b>                                 | Recombinant of NS1-CmR and pglA-KmR         | In vitro           | [11]                       | PUJG000000.1      |
| <b>pglA-KmR</b>                                    | Grape                                       | USA (CA)           | [12]                       | PUJH000000.1      |
| <b>Stag's Leap</b>                                 | Grape                                       | USA (CA)           | [13]                       | LSMJ000000.1      |
| <b>Temecula1</b>                                   | Grape                                       | USA (CA)           | [14]                       | PUJI000000.00     |
| <b>Temecula1gfp</b>                                | Mutant of Temecula1                         | In vitro           | [15]                       | PUJC000000.1      |
| <b>p TemeculaL</b>                                 | Grape                                       | USA (CA)           | [16]                       | PUJJ000000.00.1   |
| <b>TemeculaLAlmaRec1</b>                           | Recombinant of TemeculaL with AlmaEM3 donor | In vitro           | [16]                       | PUIW000000.1      |
| <b>TemeculaLAlmaRec2</b>                           | Recombinant of TemeculaL with AlmaEM3 donor | In vitro           | [16]                       | PUIX000000.1      |

|                                            |                     |            |      |                    |
|--------------------------------------------|---------------------|------------|------|--------------------|
| <b>TemeculaStar</b>                        | Grape               | USA (GA)   | [16] | PUJI000000<br>00.1 |
| <b>TPD3</b>                                | Grape               | Taiwan     | [17] | VJWG0000<br>0000.1 |
| <b>TPD4</b>                                | Grape               | Taiwan     | [17] | VJWH0000<br>0000.1 |
| <b>WM1-1</b>                               | Grape               | USA (GA)   | [2]  | PUJK00000<br>000.1 |
| <b>XYL1732</b>                             | Grape               | Spain      | [18] | QTJT00000<br>000.1 |
| <b>XYL2055</b>                             | Grape               | Spain      | [18] | QTJS00000<br>000.1 |
| <i>Xylella fastidiosa subsp. morus</i>     |                     |            |      |                    |
| <b>MUL0034</b>                             | Mulberry            | USA (CA)   | [19] | CP006740.1         |
| <b>Mul-MD</b>                              | Mulberry            | USA (MD)   | [20] | AXDP0000<br>0000.1 |
| <i>Xylella fastidiosa subsp. sandyi</i>    |                     |            |      |                    |
| <b>CFBP8356</b>                            | Coffee              | Costa Rica | [3]  | PHFV00000<br>000.1 |
| <b>Ann-1</b>                               | Oleander            | USA (CA)   | [19] | AAAM0000<br>0000.4 |
| <b>CO33</b>                                | Coffee              | Italy      | [21] | LJZW00000<br>000.1 |
| <i>Xylella fastidiosa subsp. multiplex</i> |                     |            |      |                    |
| <b>AlmaEM3</b>                             | Blueberry (Emerald) | USA (GA)   | [22] | PUIY00000<br>000.1 |
| <b>BB01</b>                                | Blueberry           | USA (GA)   | [23] | MPAZ0000<br>0000.1 |
| <b>BB08-1</b>                              | Blueberry           | USA (FL)   | [22] | PUIZ00000<br>000   |
| <b>CFBP8078</b>                            | Periwinkle          | USA (FL)   | [3]  | PHFS00000<br>000.1 |
| <b>CFBP8417</b>                            | Spanish Broom       | France     | [3]  | LUYB0000<br>0000.1 |
| <b>CFBP8418</b>                            | Spanish Broom       | France     | [3]  | LUYA0000<br>0000.1 |
| <b>Dixon</b>                               | Almond              | USA (CA)   | [24] | AAAL0000<br>0000.2 |
| <b>ESVL</b>                                | Almond              | Spain      | [25] | QPQV0000<br>0000.1 |
| <b>IVIA5901</b>                            | Almond              | Spain      | [8]  | CP047134.1         |
| <b>M12</b>                                 | Almond              | USA (CA)   | [9]  | CP000941           |
| <b>sycamore Sy-VA</b>                      | Sycamore            | USA (VA)   | [20] | JMHP00000<br>000.1 |
| <b>TOS14</b>                               | Spanish Broom       | Italy      | [26] | SMTJ00000<br>000.1 |

|                                               |                      |                           |                                             |                    |
|-----------------------------------------------|----------------------|---------------------------|---------------------------------------------|--------------------|
| <b>TOS4</b>                                   | Almond               | Italy                     | [26]                                        | SMTH0000<br>0000.1 |
| <b>TOS5</b>                                   | Myrtle-leaf milkwort | Italy                     | [26]                                        | SMTI00000<br>000.1 |
| <b>ATCC 35871</b>                             | Hybrid Plum          | USA (GA)                  | (Kyrpides et al,<br>unpublished)            | AUAJ00000<br>000.1 |
| <b>Griffin-1</b>                              | Oak                  | USA (GA)                  | [27]                                        | AVGA0000<br>0000.1 |
| <i>Xylella fastidiosa</i> subsp. <i>pauca</i> |                      |                           |                                             |                    |
| <b>3124</b>                                   | Coffee               | Brazil (São Paulo)        | [28]                                        | CP009829.1         |
| <b>CFBP8072</b>                               | Coffee               | France                    | [4]                                         | LKDK0000<br>0000.1 |
| <b>CoDiRO</b>                                 | Olive                | Italy<br>(Apulia)         | [29]                                        | JUJW00000<br>000.1 |
| <b>De Donno</b>                               | Olive                | Italy<br>(Apulia)         | [30]                                        | CP020870.1         |
| <b>PD7202</b>                                 | Coffee               | Netherlands               | [31]                                        | RRUA0000<br>0000.1 |
| <b>PD7211</b>                                 | Coffee               | Netherlands               | [31]                                        | RRTZ00000<br>000.1 |
| <b>32</b>                                     | Coffee               | Brazil (São Paulo)        | [32]                                        | AWYH000<br>00000.1 |
| <b>11399</b>                                  | Orange               | Brazil                    | [33]                                        | JNBT00000<br>000.1 |
| <b>6c</b>                                     | Coffee               | Brazil (São Paulo)        | [32]                                        | AXBS0000<br>0000.2 |
| <b>9a5c</b>                                   | Sweet orange         | Brazil (São Paulo)        | [34]                                        | AE003849.<br>1     |
| <b>COF0324</b>                                | Coffee               | Brazil                    | (Knight et al, 2017,<br>unpublished)        | LRVG0000<br>0000.1 |
| <b>COF0407</b>                                | Coffee               | Costa Rica                | (Knight et al, 2017,<br>unpublished)        | LRVJ00000<br>000.1 |
| <b>CVC0251</b>                                | Sweet orange         | Brazil                    | (Knight et al, 2017,<br>unpublished)        | LRVE0000<br>0000.1 |
| <b>CVC0256</b>                                | Sweet orange         | Brazil                    | (Knight et al, 2017,<br>unpublished)        | LRVF00000<br>000.1 |
| <b>Fb7</b>                                    | Sweet orange         | Argentina<br>(Corrientes) | [35]                                        | CP010051.2         |
| <b>Hib4</b>                                   | Hibiscus             | Brazil (São Paulo)        | (Pierry and da Silva,<br>2017, unpublished) | CP009885.1         |
| <b>J1a12</b>                                  | Sweet orange         | Brazil (São Paulo)        | (Pierry and da Silva,<br>2017, unpublished) | CP009823.1         |
| <b>OLS0478</b>                                | Oleander             | Costa Rica                | (Knight et al, 2017,<br>unpublished)        | LRVI00000<br>000.1 |
| <b>OLS0479</b>                                | Oleander             | Costa Rica                | (Knight et al, 2017,<br>unpublished)        | LRVH0000<br>0000.1 |
| <b>Pr8x</b>                                   | Plum                 | Brazil (São Paulo)        | (Pierry and da Silva<br>2015, unpublished)  | CP009826.1         |

|                  |              |                    |                              |            |
|------------------|--------------|--------------------|------------------------------|------------|
| <b>Salento-1</b> | Olive        | Italy<br>(Apulia)  | [36]                         | CP016608.1 |
| <b>Salento-2</b> | Olive        | Italy<br>(Apulia)  | [37]                         | CP016610.1 |
| <b>U24D</b>      | Sweet orange | Brazil (São Paulo) | (Da Silva, 2017 unpublished) | CP009790.1 |

#### Reference:

1. Chen, J.; O’Leary, M.; Burbank, L.; Zheng, Z.; Deng, X. Whole Genome Sequence of *Xylella fastidiosa* ATCC 35879 T and Detection of Genome Rearrangements Within Subsp. *fastidiosa*. *Curr. Microbiol.* **2020**, *77*, 1858–1863.
2. Denancé, N.; Briand, M.; Gaborieau, R.; Gaillard, S.; Jacques, M.-A. Identification of genetic relationships and subspecies signatures in *Xylella fastidiosa*. *BMC Genom.* **2019**, *20*, 239.
3. Jacques, M.-A.; Denancé, N.; Legendre, B.; Morel, E.; Briand, M.; Mississippi, S.; Durand, K.; Olivier, V.; Portier, P.; Poliakoff, F. New coffee plant-infecting *Xylella fastidiosa* variants derived via homologous recombination. *Appl. Environ. Microbiol.* **2016**, *82*, 1556–1568.
4. Zhang, S.; Flores-Cruz, Z.; Kumar, D.; Chakrabarty, P.; Hopkins, D.L.; Gabriel, D.W. The *Xylella fastidiosa* biocontrol strain EB92-1 genome is very similar and syntenic to Pierce’s disease strains. *J. Bacteriol.* **2011**, *193*, 5576–5577.
5. Schreiber, H.; Koirala, M.; Lara, A.; Ojeda, M.; Dowd, S.; Bextine, B.; Morano, L. Unraveling the first *Xylella fastidiosa* subsp. *fastidiosa* genome from Texas. *Southwest. Entomol.* **2010**, *35*, 479–483.
6. Kandel, P.P.; Almeida, R.P.; Cobine, P.A.; De La Fuente, L. Natural competence rates are variable among *Xylella fastidiosa* strains and homologous recombination occurs in vitro between subspecies *fastidiosa* and *multiplex*. *Mol. Plant Microbe Interact.* **2017**, *30*, 589–600.
7. Landa, B.B.; Velasco-Amo, M.P.; Marco-Noales, E.; Olmo, D.; López, M.M.; Navarro, I.; Monterde, A.; Barbé, S.; Montes-Borrego, M.; Román-Écija, M. Draft genome sequence of *Xylella fastidiosa* subsp. *fastidiosa* strain IVIA5235, isolated from *Prunus avium* in Mallorca Island, Spain. *Microbiol. Resour. Announc.* **2018**, *7*, e01222-18.
8. Chen, J.; Xie, G.; Han, S.; Chertkov, O.; Sims, D.; Civerolo, E. Whole genome sequences of two *Xylella fastidiosa* strains (M12 and M23) causing almond leaf scorch disease in California. *J. Bacteriol.* **2010**, *192*, 4534–4534.
9. Matsumoto, A.; Young, G.M.; Igo, M.M. Chromosome-based genetic complementation system for *Xylella fastidiosa*. *Appl. Environ. Microbiol.* **2009**, *75*, 1679–1687.
10. Kandel, P.P.; Lopez, S.M.; Almeida, R.P.; De La Fuente, L. Natural Competence of *Xylella fastidiosa* Occurs at a High Frequency Inside Microfluidic Chambers Mimicking the Bacterium’s Natural Habitats. *Appl. Environ. Microbiol.* **2016**, *82*, 5269–5277, doi:10.1128/AEM.01412-16.
11. Roper, M.C.; Greve, L.C.; Warren, J.G.; Labavitch, J.M.; Kirkpatrick, B.C. *Xylella fastidiosa* requires polygalacturonase for colonization and pathogenicity in *Vitis vinifera* grapevines. *Mol. Plant Microbe Interact.* **2007**, *20*, 411–419.
12. Chen, J.; Wu, F.; Zheng, Z.; Deng, X.; Burbank, L.; Stenger, D. Draft genome sequence of *Xylella fastidiosa* subsp. *fastidiosa* strain Stag’s leap. *Genome Announc.* **2016**, *4*, doi:10.1128/genomeA.00240-16
13. Van Sluys, M.; De Oliveira, M.; Monteiro-Vitorello, C.; Miyaki, C.; Furlan, L.; Camargo, L.; Da Silva, A.; Moon, D.; Takita, M.; Lemos, E. Comparative analyses of the complete genome sequences of Pierce’s disease and citrus variegated chlorosis strains of *Xylella fastidiosa*. *J. Bacteriol.* **2003**, *185*, 1018–1026.

14. Newman, K.L.; Almeida, R.P.P.; Purcell, A.H.; Lindow, S.E. Use of a green fluorescent strain for analysis of *Xylella fastidiosa* colonization of *Vitis vinifera*. *Appl. Environ. Microbiol.* **2003**, *69*, 7319–7327.
15. Potnis, N.; Kandel, P.P.; Merfa, M.V.; Retchless, A.C.; Parker, J.K.; Stenger, D.C.; Almeida, R.P.; Bergsma-Vlami, M.; Westenberg, M.; Cobine, P.A. Patterns of inter-and intrasubspecific homologous recombination inform eco-evolutionary dynamics of *Xylella fastidiosa*. *ISME J.* **2019**, *13*, 2319–2333.
16. Castillo, A.I.; Tuan, S.-J.; Retchless, A.C.; Hu, F.-T.; Chang, H.-Y.; Almeida, R.P. Draft Whole-Genome Sequences of *Xylella fastidiosa* subsp. *fastidiosa* Strains TPD3 and TPD4, Isolated from Grapevines in Hou-li, Taiwan. *Microbiol. Resour. Announc.* **2019**, *8*, doi:10.1128/MRA.00835-19.
17. Gomila, M.; Moralejo, E.; Busquets, A.; Seguí, G.; Olmo, D.; Nieto, A.; Juan, A.; Lalucat, J. Draft genome resources of two strains of *Xylella fastidiosa* XYL1732/17 and XYL2055/17 isolated from Mallorca vineyards. *Phytopathology* **2019**, *109*, 222–224.
18. Schuenzel, E.L.; Scally, M.; Stouthamer, R.; Nunney, L. A multigene phylogenetic study of clonal diversity and divergence in North American strains of the plant pathogen *Xylella fastidiosa*. *Appl. Environ. Microbiol.* **2005**, *71*, 3832–3839.
19. Guan, W.; Shao, J.; Davis, R.E.; Zhao, T.; Huang, Q. Genome sequence of a *Xylella fastidiosa* strain causing sycamore leaf scorch disease in Virginia. *Genome Announc.* **2014**, *2*, doi:10.1128/genomea.00773-14.
20. Giampetruzzi, A.; Loconsole, G.; Boscia, D.; Calzolari, A.; Chiumenti, M.; Martelli, G.P.; Saldarelli, P.; Almeida, R.P.; Saponari, M. Draft genome sequence of CO33, a coffee-infecting isolate of *Xylella fastidiosa*. *Genome Announc.* **2015**, *3*, doi:10.1128/genomea.01472-15.
21. Oliver, J.E.; Sefick, S.A.; Parker, J.K.; Arnold, T.; Cobine, P.A.; De La Fuente, L. Ionome changes in *Xylella fastidiosa*-infected *Nicotiana tabacum* correlate with virulence and discriminate between subspecies of bacterial Isolates. *Mol. Plant Microbe Interact.* **2014**, *27*, 1048–1058, doi:10.1094/MPMI-05-14-0151-R.
22. Van Horn, C.; Chang, C.-J.; Chen, J. De novo whole-genome sequence of *Xylella fastidiosa* subsp. *multiplex* strain BB01 isolated from a blueberry in Georgia, USA. *Genome Announc.* **2017**, *5*, doi:10.1128/genomea.01598-16.
23. Bhattacharyya, A.; Stilwagen, S.; Reznik, G.; Feil, H.; Feil, W.S.; Anderson, I.; Bernal, A.; D'Souza, M.; Ivanova, N.; Kapatral, V. Draft sequencing and comparative genomics of *Xylella fastidiosa* strains reveal novel biological insights. *Genome Res.* **2002**, *12*, 1556–1563.
24. Giampetruzzi, A.; Velasco-Amo, M.P.; Marco-Noales, E.; Montes-Borrego, M.; Roman-Ecija, M.; Navarro, I.; Monterde, A.; Barbé, S.; Almeida, R.P.; Saldarelli, P. Draft genome resources of two strains (“ESVL” and “IVIA5901”) of *Xylella fastidiosa* associated with almond leaf scorch disease in Alicante, Spain. *Phytopathology* **2019**, *109*, 219–221.
25. Giampetruzzi, A.; D’Attoma, G.; Zicca, S.; Abou Kubaa, R.; Rizzo, D.; Boscia, D.; Saldarelli, P.; Saponari, M. Draft genome sequence resources of three strains (TOS4, TOS5, and TOS14) of *Xylella fastidiosa* infecting different host plants in the newly discovered outbreak in Tuscany, Italy. *Phytopathology* **2019**, *109*, 1516–1518.
26. Chen, J.; Huang, H.; Chang, C.-J.; Stenger, D.C. Draft genome sequence of *Xylella fastidiosa* subsp. *multiplex* strain Griffin-1 from *Quercus rubra* in Georgia. *Genome Announc.* **2013**, *1*, doi:10.1128/genomea.00756-13.
27. Li, W.-B.; Pria Jr, W.; Teixeira, D.; Miranda, V.; Ayres, A.; Franco, C.; Costa, M.; He, C.-X.; Costa, P.; Hartung, J. Coffee leaf scorch caused by a strain of *Xylella fastidiosa* from citrus. *Plant Dis.* **2001**, *85*, 501–505.

28. Giampetruzzi, A.; Chiumenti, M.; Saponari, M.; Donvito, G.; Italiano, A.; Loconsole, G.; Boscia, D.; Cariddi, C.; Martelli, G.P.; Saldarelli, P. Draft genome sequence of the *Xylella fastidiosa* CoDiRO strain. *Genome Announc.* **2015**, *3*, doi:10.1128/genomea.01538-14.
29. Giampetruzzi, A.; Saponari, M.; Almeida, R.P.; Essakhi, S.; Boscia, D.; Loconsole, G.; Saldarelli, P. Complete genome sequence of the olive-infecting strain *Xylella fastidiosa* subsp. *pauca* De Donno. *Genome Announc.* **2017**, *5*, doi:10.1128/genomea.00569-17.
30. Bergsma-Vlami, M.; van de Bilt, J.; Tjou-Tam-Sin, N.; Helderma, C.; Gorkink-Smits, P.; Landman, N.; van Nieuwburg, J.; van Veen, E.; Westenber, M. Assessment of the genetic diversity of *Xylella fastidiosa* in imported ornamental *Coffea arabica* plants. *Plant Pathol.* **2017**, *66*, 1065–1074.
31. Grisard, E.C.; Teixeira, S.M.R.; de Almeida, L.G.P.; Stoco, P.H.; Gerber, A.L.; Talavera-López, C.; Lima, O.C.; Andersson, B.; de Vasconcelos, A.T.R. Trypanosoma cruzi clone Dm28c draft genome sequence. *Genome Announc.* **2014**, *2*, doi:10.1128/genomea.01114-13.
32. Niza, B.; Merfa, M.V.; Alencar, V.C.; Menegidio, F.B.; Nunes, L.R.; Machado, M.A.; Takita, M.A.; de Souza, A.A. Draft genome sequence of 11399, a transformable citrus-pathogenic strain of *Xylella fastidiosa*. *Genome Announc.* **2016**, *4*, doi:10.1128/genomea.01124-16.
33. Simpson, A.J.G.; Reinach, F.d.C.; Arruda, P.; Abreu, F.A.d.; Acencio, M.; Alvarenga, R.; Alves, L.C.; Araya, J.E.; Baia, G.S.; Baptista, C. The genome sequence of the plant pathogen *Xylella fastidiosa*. *Nature* **2000**, *406*, 151–157.
34. da Silva, V.S.; Shida, C.S.; Rodrigues, F.B.; Ribeiro, D.C.; de Souza, A.A.; Coletta-Filho, H.D.; Machado, M.A.; Nunes, L.R.; de Oliveira, R.C. Comparative genomic characterization of citrus-associated *Xylella fastidiosa* strains. *BMC Genom.* **2007**, *8*, 474.
35. Bleve, G.; Marchi, G.; Ranaldi, F.; Gallo, A.; Cimaglia, F.; FRANCESCO LOGRIECO, A.; Mita, G.; Ristori, J.; Surico, G. Molecular characteristics of a strain (Salento-1) of *Xylella fastidiosa* isolated in Apulia (Italy) from an olive plant with the quick decline syndrome. *Phytopathol. Mediterr.* **2016**, *55*, 139–146.
36. Ramazzotti, M.; Cimaglia, F.; Gallo, A.; Ranaldi, F.; Surico, G.; Giovanni, M.; Bleve, G.; Marchi, G. Insights on a founder effect: The case of *Xylella fastidiosa* in the Salento area of Apulia, Italy. *Phytopathol. Mediterr.* **2018**, *57*, 8–25.
