# Supplementary material for: Phenotypic and Phylogenetic Characterization of Cu Homeostasis among Xylella fastidiosa Strains
Source: MDPI journal article supplement (doi:10.3390/pathogens10040495), 2021-04-20
Supplement: s1 [file s1]

Figure S1: Range of CAI of *copA*, *copB*, *copL* and *cutC* genes.

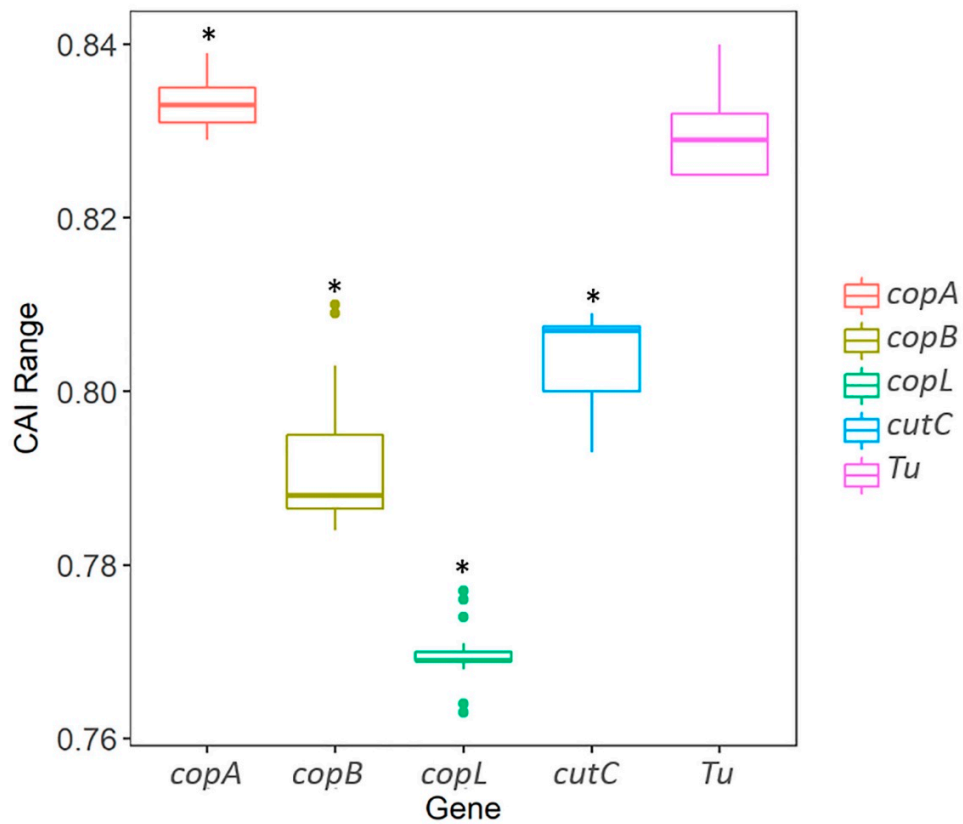

Range of CAI of *copA*, *copB*, *copL* and *cutC* genes assessed by CAIcal.

CAI (codon adaption index) calculations of *copA*, *copB*, *copL* and *cutC* genes were carried by CAIcal ([www.ppuigbo.me/programs/CAIcal](http://www.ppuigbo.me/programs/CAIcal)) as instructions [21-23]. *Tu* gene was used as reference gene. Symbol \* above each box indicated significant difference ( $p < 0.05$ ) between each tested gene and *Tu* gene according to two-tailed Student's *t*-test ( $p < 0.050$ ) (Microsoft

Excel® 2016 for Windows)
